# Supplementary material
Source: PubMed Central journal article supplement (PMC6779480)
Supplement: NIHMS1044885-supplement-Supp_TableS1-5.pdf [file NIHMS1044885-supplement-Supp_TableS1-5.pdf]

**Supplemental Table 1 - Reward Processing Studies with Chronic Pharmacotherapy Administration:**

| First author, year            | Medication, dose, duration                                                   | Active (Drug) N | Control (Placebo) N                                                | Population Type | Scan Timing | Analysis Approach   | Results                                                                                                                                                                                                                                                                                                      | Effect on Reward Processing Circuitry |
|-------------------------------|------------------------------------------------------------------------------|-----------------|--------------------------------------------------------------------|-----------------|-------------|---------------------|--------------------------------------------------------------------------------------------------------------------------------------------------------------------------------------------------------------------------------------------------------------------------------------------------------------|---------------------------------------|
| <b>Alcohol Cue Reactivity</b> |                                                                              |                 |                                                                    |                 |             |                     |                                                                                                                                                                                                                                                                                                              |                                       |
| Myrick et al., 2008           | 50mg NTX x 7 days                                                            | 23              | 24                                                                 | NTS AD          | Post        | Whole Brain and ROI | - NTX reduced activation to alcohol cues in ventral striatum.                                                                                                                                                                                                                                                | ↓                                     |
|                               | 0.5mg OND x 7 days                                                           | 23              | -OND reduced activation to alcohol cues in ventral striatum.       |                 |             |                     | ↓                                                                                                                                                                                                                                                                                                            |                                       |
|                               | 50mg NTX + 0.5mg OND x 7 days                                                | 20              | -NTX + OND reduced activation to alcohol cues in ventral striatum. |                 |             |                     | ↓                                                                                                                                                                                                                                                                                                            |                                       |
| Schacht et al., 2013b         | 50mg NTX x 6 days                                                            | 35              | 39                                                                 | NTS AD          | Post        | ROI                 | - No significant effect of NTX on activation in regions of interest: VS, mPFC, OFC.                                                                                                                                                                                                                          | -                                     |
| Lukas et al., 2013            | 380mg extended-release NTX (single dose delivered 14 days prior to scanning) | 15              | 13                                                                 | TS Detoxed AD   | Pre, Post   | Whole Brain         | - NTX reduced activation in orbital gyri, cingulate, inferior frontal gyrus, and middle frontal gyrus to visual alcohol cues compared to placebo.<br><br>- NTX reduced activation in superior frontal gyrus, supramarginal gyrus, postcentral gyrus, and angular gyrus to alcohol odors compared to placebo. | ↓<br><br>-                            |
| Schacht et al., 2017          | 50mg NTX x 14 days                                                           | 59              | 57                                                                 | TS AD           | Pre, Post   | ROI                 | - NTX reduced right ventral striatal activation to alcohol cues compared to placebo.                                                                                                                                                                                                                         | ↓                                     |

|                       |                                                                                   |                                |     |               |           |                     |                                                                                                                                                                                    |            |
|-----------------------|-----------------------------------------------------------------------------------|--------------------------------|-----|---------------|-----------|---------------------|------------------------------------------------------------------------------------------------------------------------------------------------------------------------------------|------------|
| Bach et al., 2019     | Open-label NTX x 14 days                                                          | 22                             | 13  | TS Detoxed AD | Pre, Post | Whole Brain and ROI | - NTX reduced alcohol cue-elicited activation in the putamen compared to the non-pharmacological withdrawal treatment group.                                                       | ↓          |
| Schacht et al., 2014  | 2mg varenicline x 14 days                                                         | 18                             | 17  | NTS AD        | Post      | ROI                 | - VAR reduced activation in bilateral OFC compared to placebo.                                                                                                                     | ↓          |
| Schacht et al., 2013a | 1200mg Gabapentin (maximum dose) x 21 days + 2mg infusions of flumazenil x 2 days | 28                             | 20  | TS AD         | Post      | Whole Brain         | - No significant main effect of medication. In individuals with high levels of alcohol withdrawal GBP increased activation in ACC in response to alcohol cues compared to placebo. | -          |
| Beck et al., 2018     | 30-270mg baclofen x 14 days (individually titrated, mean dose = 138mg)            | 10                             | 13  | TS Detoxed AD | Pre, Post | ROI                 | - BAC decreased activation in left OFC, bilateral amygdala, and left VTA compared to placebo                                                                                       | ↓          |
| Holla et al., 2018    | 60mg baclofen x 17 days                                                           | 23                             | n/a | TS AUD        | Pre, Post | Whole Brain and ROI | - BAC increased activation in bilateral DLPFC and right ACC, and decreased activation in right insula compared to control group with AUD.                                          | ↑ and ↓    |
| Logge et al., 2019    | 30mg baclofen (low dose) or 74mg baclofen (high dose) x 17 days                   | 11 (low dose)<br>8 (high dose) | 11  | TS AD         | Post      | Whole Brain         | - No significant group differences for low dose<br><br>- High dose BAC decreased activation to alcohol cues in                                                                     | -<br><br>↓ |

|                       |                                                 |    |    |                                 |           |             |                                                                                                                                                                               |         |
|-----------------------|-------------------------------------------------|----|----|---------------------------------|-----------|-------------|-------------------------------------------------------------------------------------------------------------------------------------------------------------------------------|---------|
|                       |                                                 |    |    |                                 |           |             | the DLPFC, mPFC, and ACC compared to placebo.<br>baclofen compared to placebo.                                                                                                |         |
| Myrick et al., 2010   | 15mg aripiprazole x 14 days                     | 14 | 16 | NTS AD                          | Post      | ROI         | - APZ reduced activation in left VTA and right VS compared to placebo group.                                                                                                  | ↓       |
| Han et al., 2013      | 15mg aripiprazole + 20mg Escitalopram x 42 days | 14 | 17 | TS Detoxed AD with comorbid MDD | Pre, Post | Whole brain | - APZ + ESC increased activation in left ACC compared to ESC alone.                                                                                                           | ↑       |
| Schacht et al., 2018  | 15mg aripiprazole x 7 days                      | 38 | 43 | NTS AUD                         | Post      | ROI         | - APZ interacted with DAT1 genotype; in 9R carriers APZ reduced VS activation whereas in 10R homozygotes, APZ increased VS activation to alcohol cues compared to placebo.    | -       |
| Kwako et al., 2015b   | 1000mg pexacerfont x 21 days                    | 29 | 26 | TS Detoxed AD                   | Post      | Whole Brain | - No significant effect of PEX on alcohol cue reactivity.                                                                                                                     | -       |
| Schwandt et al., 2016 | 350mg verucerfont x 21 days                     | 18 | 21 | TS Detoxed AD                   | Post      | Whole Brain | - Mixed effects, VER reduced activation in some frontal, temporal, and occipital regions, and increased activation in other frontal and temporal regions compared to placebo. | ↑ and ↓ |
| George et al., 2008   | 50mg LY686017 x 21 days                         | 25 | 25 | TS Detoxed AD                   | Post      | Whole Brain | - No significant medication effect.                                                                                                                                           | -       |

|                                                                          |                                     |    |    |                                  |              |                           |                                                                                                                                                           |                                    |
|--------------------------------------------------------------------------|-------------------------------------|----|----|----------------------------------|--------------|---------------------------|-----------------------------------------------------------------------------------------------------------------------------------------------------------|------------------------------------|
| Kwako et al., 2015a                                                      | 125mg<br>aprepitant x<br>21 days    | 26 | 27 | TS<br>Detoxed<br>AD with<br>PTSD | Post         | Whole<br>Brain            | - No significant effects of<br>APREP on neural alcohol cue<br>reactivity.                                                                                 | -                                  |
| Langosch<br>et al.,<br>2012                                              | 1998mg<br>acamprosate x<br>14 days  | 12 | 10 | TS AD                            | Pre,<br>Post | Whole<br>Brain and<br>ROI | - No significant effect of<br>acamprosate on modulating<br>BOLD response to alcohol<br>cues.                                                              | -                                  |
| Kiefer et<br>al., 2015                                                   | 50mg D-<br>cycloserine x<br>21 days | 16 | 16 | TS<br>Detoxed<br>AD              | Pre,<br>Post | Whole<br>brain            | - DCS combined with cue-<br>exposure-based extinction<br>training (CET) reduced<br>activation in ventral and<br>dorsal striatum compared to<br>CET alone. | ↓                                  |
| <b>Monetary Incentive Delay Task / Alcohol Food Incentive Delay Task</b> |                                     |    |    |                                  |              |                           |                                                                                                                                                           |                                    |
| Vatsalya<br>et al.,<br>2015*                                             | 2mg<br>varenicline x<br>14 days     | 17 | 12 | NTS HD                           | Post         | Whole<br>Brain and<br>ROI | - VAR reduced activation in<br>striatum, insula, and<br>amygdala during alcohol<br>anticipation compared to<br>placebo.                                   | ↓                                  |
|                                                                          |                                     |    |    |                                  |              |                           |                                                                                                                                                           | 10 ↓<br>1 ↑<br>2 ↑ and ↓<br>9 Null |

**Supplemental Table 2 - Affective Processing Studies with Chronic Pharmacotherapy Administration:**

| First author, year             | Medication, dose, duration   | Active (Drug) N | Control (Placebo) N | Population Type         | Scan Timing | Analysis Approach   | Results                                                                                   | Effect on Affective Processing Circuitry |
|--------------------------------|------------------------------|-----------------|---------------------|-------------------------|-------------|---------------------|-------------------------------------------------------------------------------------------|------------------------------------------|
| <b>Affective Image Stimuli</b> |                              |                 |                     |                         |             |                     |                                                                                           |                                          |
| Spagnolo et al., 2014          | 50mg NTX x 9 days            | 31              | 32                  | TS AD                   | Post        | ROI                 | - NTX increased activation in ventral striatum to all stimuli compared to placebo.        | ↑                                        |
| Gowin et al., 2016*            | 2mg varenicline x 14 days    | 17              | 15                  | NTS HD                  | Post        | Whole Brain and ROI | - VAR reduced activation in left amygdala when viewing fearful faces compared to placebo. | ↓                                        |
| Kwako et al., 2015b            | 1000mg pexacerfont x 21 days | 29              | 26                  | TS Detoxed AD           | Post        | Whole Brain         | - No significant effect of PEX on neural processing of affective stimuli.                 | -                                        |
| Schwandt et al., 2016          | 350mg verucerfont x 21 days  | 18              | 21                  | TS Detoxed AD           | Post        | Whole Brain         | - VER reduced activation in right amygdala to fearful faces compared to placebo.          | ↓                                        |
| Kwako et al., 2015a            | 125mg aprepitant x 21 days   | 26              | 27                  | TS Detoxed AD with PTSD | Post        | Whole Brain         | - No significant medication effects on activation to affective faces.                     | -                                        |
| <b>Affective Face Stimuli</b>  |                              |                 |                     |                         |             |                     |                                                                                           |                                          |
| Kwako et al., 2015b            | 1000mg pexacerfont x 21 days | 29              | 26                  | TS Detoxed AD           | Post        | Whole Brain         | - No significant effect of PEX on neural processing of negative images.                   | -                                        |
| Schwandt et al., 2016          | 350mg verucerfont x 21 days  | 18              | 21                  | TS Detoxed AD           | Post        | Whole Brain         | - No significant medication effects.                                                      | -                                        |
| George et al., 2008            | 50mg LY686017 x 21 days      | 25              | 25                  | TS Detoxed AD           | Post        | Whole Brain         | - LY686017 reduced activation to negative images in insula and occipital                  | ↓                                        |



**Supplemental Table 3 - Reward Processing Studies with Acute Pharmacotherapy Administration:**

| First author, year                                                       | Medication, dose, duration               | AUD N                                                                               | Comparison Group N  | Analysis Approach   | Results                                                                                                                                                                        | Effect on Reward Processing Circuitry |
|--------------------------------------------------------------------------|------------------------------------------|-------------------------------------------------------------------------------------|---------------------|---------------------|--------------------------------------------------------------------------------------------------------------------------------------------------------------------------------|---------------------------------------|
| <b>Alcohol Cue Reactivity</b>                                            |                                          |                                                                                     |                     |                     |                                                                                                                                                                                |                                       |
| Hermann et al., 2006                                                     | 400mg amisulpride x 2 hours              | 10 AD                                                                               | 10 Healthy Controls | Whole Brain         | - Amisulpride reduced alcohol cue-elicited activation in right thalamus to alcohol cues compared to placebo and normalized activation compared to healthy controls.            | ↓                                     |
| Hansson et al., 2018                                                     | 24 IU oxytocin (intranasal) x 45 minutes | 12 NTS-HD                                                                           | N/A                 | Whole Brain and ROI | - Oxytocin reduced activation to alcohol cues in the insula, hippocampus, cingulate gyrus, and medial frontal gyrus compared to placebo.                                       | ↓                                     |
| <b>Monetary Incentive Delay Task / Alcohol Food Incentive Delay Task</b> |                                          |                                                                                     |                     |                     |                                                                                                                                                                                |                                       |
| Nestor et al., 2017*                                                     | 50mg NTX x 2 hours                       | 21 abstinent AD only<br><br>25 abstinent Polysubstance (AD + Other Drug Dependence) | 35 Healthy Controls | Whole Brain         | - No significant group X medication interaction on reward processing.                                                                                                          | -                                     |
| Quelch et al., 2017                                                      | 18mg nalmefene x 4 hours                 | 18 AUD                                                                              | N/A                 | Whole Brain and ROI | - Nalmefene reduced activation in striatum and brainstem/cerebellum during reward processing compared to placebo while receiving an alcohol infusion.                          | ↓                                     |
| Murphy et al., 2017                                                      | 60mg GSK598809 x 2 hours                 | 18 abstinent AD Only<br><br>32 abstinent Polysubstance (AD + other dependence)      | 33 Healthy Controls | Whole brain and ROI | - Significant group X medication interaction in DLPFC, such that GSK598809 increased reward response in AUD individuals more than the polysubstance or healthy control groups. | ↑                                     |

**Delay Discounting**

|                        |                           |                |                     |                     |                                                                                                                                                                                                                                                 |                                   |
|------------------------|---------------------------|----------------|---------------------|---------------------|-------------------------------------------------------------------------------------------------------------------------------------------------------------------------------------------------------------------------------------------------|-----------------------------------|
| Boettiger et al., 2009 | 50mg NTX x 2 hours        | 9 abstinent AD | 10 Healthy controls | Whole Brain and ROI | - No significant group X medication interaction. NTX increased activation in OFC during “later” decisions across AUD and healthy control groups.                                                                                                | ↑                                 |
| Schmaal et al., 2014*  | 200mg modafinil x 2 hours | 14 AD          | 18 Healthy Controls | Whole Brain         | - Group X medication interaction in left superior frontal gyrus and vmPFC when making “now” decisions, such that in individuals with AUD, modafinil increased activation in the SFG and decreased activation in the vmPFC compared to controls. | ↑ and ↓                           |
|                        |                           |                |                     |                     |                                                                                                                                                                                                                                                 | 3 ↓<br>2 ↑<br>1 ↑ and ↓<br>1 Null |



**Supplemental Table 4 - Affective Processing Studies with Acute Pharmacotherapy Administration:**

| First author, year             | Medication, dose, duration | AUD N                                                                                      | Comparison Group N  | Analysis Approach | Results                                                                                                                           | Effect on Affective Processing Circuitry |
|--------------------------------|----------------------------|--------------------------------------------------------------------------------------------|---------------------|-------------------|-----------------------------------------------------------------------------------------------------------------------------------|------------------------------------------|
| <b>Affective Image Stimuli</b> |                            |                                                                                            |                     |                   |                                                                                                                                   |                                          |
| Savulich et al., 2017          | 50mg NTX x 2 hours         | 18 abstinent AD only<br><br>21 abstinent Polysubstance (AD + Cocaine or Opioid Dependence) | 21 Healthy Controls | ROI               | - No effect of NTX on AUD only group. NTX reduced amygdala activation in polysubstance using group compared to AUD and HC groups. | -                                        |

**Supplemental Table 5 - Inhibitory Control Studies with Acute Pharmacotherapy Administration:**

| First author, year      | Medication, dose, duration | AUD N                                                                               | Comparison Group N  | Analysis Approach   | Results                                                                                                                                                                                                                                                                                  | Effect on Inhibitory Control Circuitry |
|-------------------------|----------------------------|-------------------------------------------------------------------------------------|---------------------|---------------------|------------------------------------------------------------------------------------------------------------------------------------------------------------------------------------------------------------------------------------------------------------------------------------------|----------------------------------------|
| <b>Go/No-Go</b>         |                            |                                                                                     |                     |                     |                                                                                                                                                                                                                                                                                          |                                        |
| Nestor et al., 2018*    | 50mg NTX x 2 hours         | 21 abstinent AD only<br><br>25 abstinent Polysubstance (AD + Other Drug Dependence) | 35 Healthy Controls | Whole Brain         | - Significant group X medication interaction in left OFC and left anterior insula. In AUD only individuals, NTX increased activation in OFC compared to the polysubstance group. In polysubstance users, NTX increased activation in the anterior insula compared to the AUD only group. | ↑                                      |
| Murphy et al., 2017     | 60mg GSK598809 x 2 hours   | 18 abstinent AD Only<br><br>32 abstinent Polysubstance (AD + other dependence)      | 33 Healthy Controls | Whole brain and ROI | - No significant group X medication interaction.                                                                                                                                                                                                                                         | -                                      |
| <b>Stop Signal Task</b> |                            |                                                                                     |                     |                     |                                                                                                                                                                                                                                                                                          |                                        |
| Schmaal et al., 2013b*  | 200mg modafinil x 2 hours  | 16 AD                                                                               | 16 Healthy Controls | Whole brain         | - Group X medication interaction in left putamen, such that modafinil increased activation in AUD individuals compared to controls.                                                                                                                                                      | ↑                                      |
|                         |                            |                                                                                     |                     |                     |                                                                                                                                                                                                                                                                                          | 0 ↓<br>2 ↑<br>1 Null                   |
